# Supplementary material for: Formulation and Optimal Design of Dioscorea bulbifera and Honey-Loaded Gantrez®/Xyloglucan Hydrogel as Wound Healing Patches
Source: MDPI journal article supplement (doi:10.3390/pharmaceutics14061302), 2022-06-19
Supplement: s1 [file s1]

## Supporting Information

### Honey release behavior

#### Method

The honey release from hydrogel patches was investigated by reducing sugar measurement. The hydrogel patches were added to 20 mL PBS pH 7.4 and constantly stirred at 37°C in an incubator shaker. The test samples were removed at specific time points (0.5, 1, 1.5, 2, 3, 6, and 9 h) and replaced PBS to complete the initial volume. The amount of honey released in each period was measured using dinitrosalicylic acid reagent (DNS reagent) described previously [1]. Briefly, 1 mL of honey solutions were mixed with 4 mL of DNS reagent. The test samples were heated in boiling water for 5 min and then decreased to room temperature. The absorbance was measured at 540 nm using a spectrophotometer. The percentage of honey release was calculated by the following Equation (S1).

$$\text{Release (\%)} = \frac{A_t}{A_i} \times 100 \quad (\text{S1})$$

Where  $A_i$  and  $A_t$  are amounts of initial honey and release after immersion, respectively.

#### Result and Discussion

The honey release behavior of the honey-loaded Gan/XG hydrogel patch is shown in Figure S1. Honey was rapidly released from the hydrogels and the complete release was obtained within 3 h. Honey released from the *D. bulbifera* extract/honey-loaded patch could not be evaluated due to the color of extract interfered the measurement. However, honey release from the *D. bulbifera* extract/honey-loaded patch was probably similar to the honey-loaded patch.

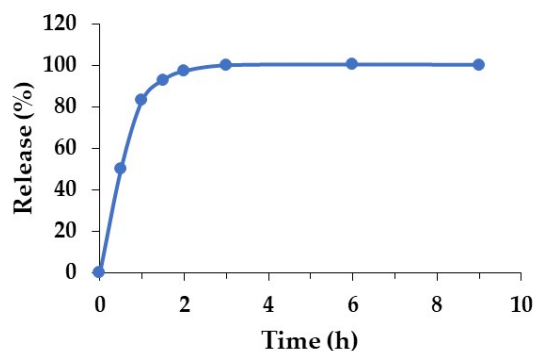

**Figure S1.** The honey release curve of honey-loaded Gan/XG patch.

#### Reference

1. Saqib, A.A.N.; Whitney, P.J. Differential behaviour of the dinitrosalicylic acid (DNS) reagent towards mono- and di-saccharide sugars. *Biomass and Bioenergy* **2011**, *35*, 4748-4750.
